# Supplementary material for: Study of Structure and Magnetic Properties of SmCo10 Alloy Prepared by Different Methods
Source: Hindawi journal article supplement (doi:10.1155/2018/6457534), 2018-01-01

**Highlights**

- Co-rich SmCo10 alloys prepared by three methods were studied.
- The as-spun SmCo10 ribbons are composed of TbCu7-type Sm2Co17 and α-Co.
- EXAFS was used to analyze the atomic structures of Sm-Co phases.
- The phase transition and magnetic properties were comprehensively discussed.

**Graphical Abstract**


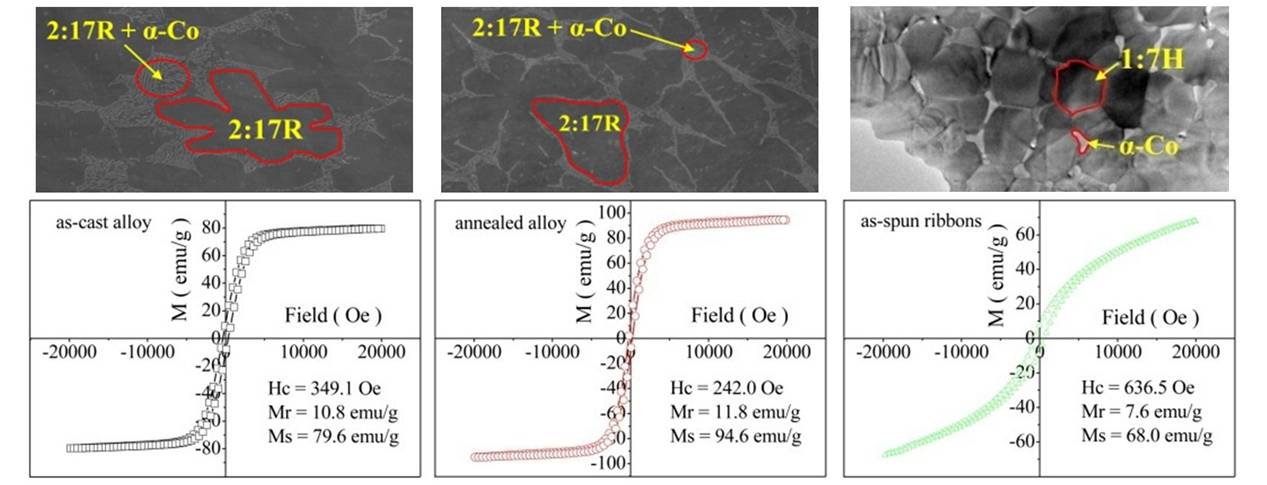

Supplement: f1 [file 6457534.f1.docx]
